# Supplementary material for: Quantitative Genetics of Food Intake in Drosophila melanogaster
Source: PLoS One. 2015 Sep 16;10(9):e0138129. doi: 10.1371/journal.pone.0138129 (PMC4574202; doi:10.1371/journal.pone.0138129)
Supplement: S4 Table — (XLSX) [file pone.0138129.s005.xlsx]

## Sheet: S4 Table
Variant ID	Minor Allele	Major Allele	Reference Allele	Minor Allele Frequency	Minor Allele Count	Major Allele Count	Female Effect	Female P-value	Male Effect	Male P-value	Sex Average Effect	Sex Average P-value	Sex Difference Effect	Sex Difference P-Value	FlyBase ID Gene 1	Gene 1 Symbol	Gene 1 Site Class	FlyBase ID Gene 2	Gene 2 Symbol	Gene 2 Site Class	FlyBase ID Gene 3	Gene 3 Symbol	Gene 3 Site Class
2L_15641230_SNP	T	A	A	0.1071	18	150	-1.526	0.000646655	-1.663	5.09462e-06	-1.593	1.53391e-05	0.1392	0.682276	> 1 kb from gene
2L_18630849_SNP	T	A	T	0.2975	47	111	1.029	0.000234326	1.073	1.4421e-05	1.055	3.22991e-06	-0.0357	0.88039	FBgn0032694	MESR3	INTRON
2L_2944268_SNP	T	G	G	0.4398	73	93	-1.199	5.1665e-06	-0.7735	0.00153198	-0.9969	2.48783e-05	-0.4467	0.0349763	FBgn0041111	lilli	INTRON
2L_4658980_SNP	A	T	T	0.0791	14	163	0.9933	0.0930197	1.964	3.06279e-06	1.487	0.00057555	-0.9543	0.0112084	> 1 kb from gene
2L_4683959_SNP	A	G	G	0.2114	37	138	1.134	0.000181089	1.171	2.01733e-05	1.153	9.78353e-06	-0.03649	0.885054	FBgn0031620	CG11929	INTRON	FBgn0000227	Bsg25A	SYNONYMOUS_CODING
2L_7177948_SNP	A	G	G	0.4444	68	85	-1.258	4.23265e-06	-0.8158	0.000599297	-1.023	1.70266e-05	-0.4143	0.0604676	> 1 kb from gene
2L_8044259_SNP	T	A	A	0.0977	17	157	-1.71	0.000122311	-1.591	2.82726e-05	-1.652	9.63123e-06	-0.1219	0.726101	FBgn0031981	CG7466	INTRON
2R_10575017_SNP	A	G	G	0.08475	15	162	-2.214	2.05552e-06	-1.232	0.00268104	-1.717	2.59992e-05	-0.9706	0.00772021	FBgn0020269	mspo	INTRON
2R_1092947_SNP	A	G	A	0.213	36	133	0.9967	0.00249181	1.247	6.31701e-06	1.126	5.4487e-05	-0.2422	0.343646	FBgn0053554	Nipped-A	INTRON
2R_15394287_SNP	T	C	C	0.07303	13	165	-1.089	0.0774072	0.6385	0.153907	-0.2252	0.757648	-1.727	6.06941e-06	FBgn0050223	tRNA:CR30223	UPSTREAM
2R_15783263_SNP	T	C	C	0.3155	53	115	-0.5286	0.120211	-1.133	7.89214e-06	-0.8315	0.00185859	0.6028	0.00714342	> 1 kb from gene
2R_16798366_SNP	C	G	G	0.05114	9	167	1.722	0.00495055	-0.3775	0.483832	0.6723	0.176715	2.1	3.56377e-06	FBgn0034560	CG9235	53 bp DOWNSTREAM					332	CG9235
2R_16947965_SNP	A	T	T	0.3729	66	111	0.9674	0.000103087	0.0067	0.8841	0.4818	0.0166188	0.9502	3.88837e-06	FBgn0034578	CG15653	SYNONYMOUS_CODING	FBgn0034579	mRpL54	319 bp UPSTREAM	FBgn0034577	cpa	577 bp DOWNSTREAM
2R_17426248_SNP	A	G	G	0.07865	14	164	-1.999	2.40437e-05	-0.172	0.693953	-1.082	0.00848908	-1.82	7.07952e-07	FBgn0069056	CG33226	NON_SYNONYMOUS_CODING	FBgn0003731	Egfr	INTRON	FBgn0050287	CG30287	728 bp UPSTREAM
2R_18974866_SNP	T	C	C	0.2989	52	122	-0.9732	0.00139909	-1.11	7.81238e-06	-1.063	2.88194e-05	0.09454	0.675301	FBgn0034820	CG13538	SYNONYMOUS_CODING
2R_19007208_SNP	T	C	C	0.08092	14	159	-1.341	0.00497878	0.3181	0.480249	-0.5039	0.162036	-1.644	8.80775e-06	> 1 kb from gene
2R_19530539_SNP	C	T	T	0.4589	67	79	-1.319	1.5874e-06	-0.7292	0.00340475	-1.039	1.61416e-05	-0.6202	0.00562818	FBgn0004795	retn	SYNONYMOUS_CODING
2R_4108546_SNP	G	A	G	0.3977	70	106	-1.099	2.43616e-05	-0.9219	6.23885e-05	-1.026	4.79968e-06	-0.2077	0.321796	FBgn0053087	LRP1	SYNONYMOUS_CODING
2R_4294967_SNP	A	T	T	0.1279	22	150	-1.613	8.56024e-06	-1.072	0.00117965	-1.342	1.61904e-05	-0.5405	0.0811526	FBgn0033289	CG2121	INTRON
2R_4623998_DEL	AA	G	AA	0.1726	29	139	1.498	7.10083e-05	1.256	6.13511e-05	1.381	6.92978e-06	0.2488	0.370851	FBgn0027585	CG8740	INTRON	FBgn0261267	CG42615	826 bp UPSTREAM
2R_7039065_SNP	C	T	C	0.4867	73	77	1.019	0.00191179	1.095	9.08205e-06	1.076	3.60936e-05	-0.03788	0.864906	FBgn0033579	CG13229	INTRON
3L_10331313_SNP	T	C	T	0.2955	52	124	-0.8946	0.00418009	-1.204	1.3858e-06	-1.046	6.33441e-05	0.3158	0.159704	> 1 kb from gene
3L_12316489_SNP	A	T	T	0.3647	62	108	-0.9677	0.000641272	-1.107	3.56195e-06	-1.034	2.20053e-05	0.1465	0.499756	> 1 kb from gene
3L_12324441_SNP	A	T	T	0.15	27	153	-1.498	0.000107049	-1.464	2.64069e-06	-1.476	3.50722e-06	-0.02448	0.931442	FBgn0052105	CG32105	INTRON
3L_12852720_SNP	G	C	C	0.1243	22	155	1.301	0.00134463	1.55	7.56156e-06	1.427	5.41365e-05	-0.2473	0.4255	FBgn0052107	CG32107	NON_SYNONYMOUS_CODING
3L_14083726_SNP	A	C	C	0.4788	79	86	-1.176	7.34115e-06	-0.5937	0.0119438	-0.8783	9.14374e-05	-0.5692	0.00679573	> 1 kb from gene
3L_14548724_SNP	T	A	A	0.08671	15	158	-2.1	7.25543e-06	-1.313	0.00134895	-1.701	1.99035e-05	-0.7755	0.0341052	> 1 kb from gene
3L_14548733_SNP	T	C	C	0.08671	15	158	-2.1	7.25543e-06	-1.313	0.00134895	-1.701	1.99035e-05	-0.7755	0.0341052	> 1 kb from gene
3L_15007559_SNP	T	G	T	0.3235	55	115	1.264	7.13304e-06	0.6722	0.00632335	0.9772	4.82191e-05	0.61	0.00581241	FBgn0261090	Sytbeta	236 bp DOWNSTREAM	FBgn0036463	Reck	397 bp UPSTREAM
3L_16388169_SNP	T	C	T	0.3663	63	109	-1.18	0.000125169	-1.187	7.37739e-07	-1.202	2.13005e-06	-0.03096	0.88589	FBgn0036627	Grp	SYNONYMOUS_CODING
3L_16872227_SNP	T	C	C	0.1461	26	152	1.394	5.6074e-05	1.245	6.14038e-05	1.323	7.36404e-06	0.1565	0.588367	FBgn0261565	Lmpt	INTRON	FBgn0052170	CG32170	UTR_3_PRIME
3L_1741283_SNP	A	G	G	0.05618	10	168	-1.454	0.0321816	-2.246	5.39501e-06	-1.844	0.000587416	0.8043	0.068613	FBgn0035266	Gk	INTRON
3L_18293062_SNP	C	T	T	0.4368	76	98	-1.083	2.38311e-05	-0.8067	0.000302396	-0.9553	9.65426e-06	-0.2971	0.152736	FBgn0036785	CG13700	INTRON
3L_18296731_SNP	T	C	C	0.4412	75	95	1.061	5.72966e-05	0.9582	3.33908e-05	1.006	8.39938e-06	0.09544	0.650259	FBgn0015946	grim	UTR_3_PRIME
3L_18296807_SNP	A	G	A	0.269	46	125	-0.9844	0.000336549	-1.159	4.87854e-06	-1.068	8.36725e-06	0.1813	0.440313	FBgn0015946	grim	SYNONYMOUS_CODING
3L_18296810_SNP	C	A	C	0.3588	61	109	-1.071	6.51251e-05	-0.9855	2.44206e-05	-1.024	5.70159e-06	-0.07678	0.724611	FBgn0015946	grim	SYNONYMOUS_CODING
3L_2545690_SNP	G	A	G	0.4913	85	88	0.5952	0.0532519	-0.3298	0.155724	0.1275	0.691043	0.9146	5.6906e-06	FBgn0010905	Spn	INTRON
3L_4055842_SNP	C	T	T	0.2775	48	125	-1.3	7.46748e-06	-0.5769	0.0244654	-0.9329	0.000182034	-0.712	0.00182409	FBgn0035490	CG1136	INTRON
3L_6028616_SNP	A	C	C	0.0838	15	164	-1.371	0.00584723	0.2889	0.502666	-0.5377	0.194252	-1.653	3.65997e-06	FBgn0040060	yip7	INTRON	FBgn0035661	CG10477	905 bp UPSTREAM	FBgn0264603	CG43952	974 bp UPSTREAM
3L_6367567_SNP	C	T	T	0.162	29	150	1.421	3.44448e-05	0.2259	0.494959	0.8309	0.00520117	1.21	6.84504e-06	> 1 kb from gene
3L_6820030_SNP	C	G	G	0.09659	17	159	-1.206	0.0066456	0.356	0.399932	-0.4208	0.225102	-1.554	4.28446e-06	> 1 kb from gene
3L_6982506_SNP	A	T	T	0.05028	9	170	-2.664	1.28021e-05	-2.122	3.77834e-05	-2.388	3.53142e-06	-0.532	0.25306	> 1 kb from gene
3L_7021927_SNP	T	C	C	0.1677	26	129	-1.025	0.00784127	0.2629	0.41612	-0.3797	0.244829	-1.285	6.52073e-06	FBgn0260660	mp	INTRON
3L_9911232_SNP	G	A	A	0.07821	14	165	-2.097	1.6387e-05	-0.4294	0.270613	-1.259	0.00149215	-1.66	6.87975e-06	FBgn0085385	CG34356	INTRON
3R_10940442_SNP	C	A	A	0.05056	9	169	-1.966	9.37321e-05	0.2602	0.690552	-0.8489	0.0315443	-2.218	8.80994e-07	FBgn0261859	CG42788	INTRON
3R_13637022_SNP	C	A	A	0.2339	40	131	1.367	5.13816e-06	1.016	0.000211341	1.194	6.37342e-06	0.357	0.145964	FBgn0038552	CG18012	174 bp UPSTREAM	FBgn0261649	tinc	241 bp UPSTREAM
3R_13637036_SNP	A	G	G	0.237	41	132	1.364	3.27081e-06	1.03	0.000133124	1.199	3.55997e-06	0.339	0.163065	FBgn0038552	CG18012	188 bp UPSTREAM	FBgn0261649	tinc	227 bp UPSTREAM
3R_15337773_SNP	A	T	T	0.1438	22	131	1.297	0.00159659	-0.05991	0.801448	0.6237	0.0836327	1.367	7.67235e-06	FBgn0260003	Dys	INTRON
3R_15404766_SNP	A	G	G	0.2428	42	131	-0.4323	0.203404	0.6224	0.0271972	0.101	0.783933	-1.043	9.34029e-06	FBgn0260003	Dys	INTRON
3R_15404769_SNP	A	G	G	0.2514	44	131	-0.4238	0.192163	0.6285	0.0220898	0.1078	0.751262	-1.042	6.52834e-06	FBgn0260003	Dys	INTRON
3R_15638933_SNP	T	G	G	0.1737	29	138	0.7747	0.0298271	-0.4919	0.0798071	0.1484	0.783926	1.281	2.10972e-06	FBgn0014135	bnl	INTRON
3R_15644534_SNP	A	G	G	0.2202	37	131	1.058	0.00201617	1.356	1.03781e-06	1.2	1.76472e-05	-0.3118	0.218266	FBgn0014135	bnl	INTRON
3R_15644548_SNP	A	G	G	0.1558	24	130	1.378	0.000585511	1.687	3.63507e-07	1.53	4.71008e-06	-0.3145	0.298273	FBgn0014135	bnl	INTRON
3R_18079582_SNP	T	G	G	0.1543	27	148	-1.465	1.38779e-05	-1.081	0.000457644	-1.323	8.16909e-06	-0.4842	0.0883441	FBgn0051163	SKIP	INTRON
3R_18079793_SNP	A	G	G	0.1714	30	145	-1.49	8.02259e-06	-0.8873	0.00286545	-1.186	3.42525e-05	-0.5977	0.027746	FBgn0051163	SKIP	INTRON
3R_18081003_SNP	G	C	C	0.193	33	138	-1.396	0.000114475	-1.32	3.54697e-06	-1.353	3.6896e-06	-0.06651	0.801179	FBgn0051163	SKIP	INTRON
3R_20790627_SNP	G	A	G	0.3609	61	108	1.295	6.68316e-06	1.12	6.67452e-06	1.218	1.54422e-06	0.1958	0.369279	> 1 kb from gene
3R_21533153_SNP	A	T	T	0.4387	68	87	1.246	4.12059e-06	1.055	1.19815e-05	1.146	9.03703e-07	0.1823	0.408191	FBgn0051092	LpR2	INTRON
3R_22084571_SNP	A	G	G	0.1988	34	137	1.468	1.03823e-05	1.171	6.00308e-05	1.314	6.29652e-06	0.2861	0.272599	FBgn0000064	Ald	INTRON
3R_23911489_SNP	C	A	A	0.08982	15	152	-1.429	0.000325012	-1.782	3.78838e-06	-1.603	5.15642e-06	0.3575	0.331916	FBgn0085391	CG34362	INTRON
3R_25290291_SNP	T	A	A	0.05143	9	166	-1.667	0.00880403	0.6071	0.228621	-0.5295	0.390759	-2.273	4.54564e-07	FBgn0004369	Ptp99A	INTRON
3R_25742643_SNP	G	A	A	0.3476	57	107	1.241	1.25211e-05	0.9938	5.68922e-05	1.122	3.51204e-06	0.2571	0.249248	FBgn0003861	trp	INTRON
3R_25742646_SNP	A	G	G	0.3515	58	107	1.256	7.82411e-06	1.025	2.86019e-05	1.146	1.72903e-06	0.2409	0.277628	FBgn0003861	trp	INTRON
3R_25742649_SNP	T	A	A	0.3497	57	106	1.239	1.19757e-05	0.9896	6.63123e-05	1.119	3.84638e-06	0.2597	0.245152	FBgn0003861	trp	INTRON
3R_25742654_SNP	C	G	G	0.3519	57	105	1.268	5.80772e-06	1.009	4.99222e-05	1.143	2.32848e-06	0.2687	0.230029	FBgn0003861	trp	INTRON
3R_25742689_SNP	A	G	G	0.3497	57	106	1.275	5.849e-06	1.026	3.31074e-05	1.156	1.6601e-06	0.2594	0.245748	FBgn0003861	trp	SYNONYMOUS_CODING
3R_25839303_SNP	T	G	T	0.4832	72	77	-0.8013	0.0156577	-1.222	7.70284e-07	-1.006	0.000163982	0.4325	0.0517155	FBgn0039737	CG7920	INTRON
3R_26373792_SNP	T	C	C	0.2619	44	124	1.345	8.7437e-05	1.275	3.08021e-06	1.317	8.81824e-06	0.08325	0.727756	FBgn0082582	tmod	INTRON
3R_26930041_INS	AAAATTTCG	GC	GC	0.1163	20	152	-0.7779	0.0477801	0.6377	0.0904731	-0.1202	0.689116	-1.516	1.39447e-06	> 1 kb from gene
3R_5965351_SNP	A	C	C	0.2061	34	131	1.35	4.90009e-05	1.216	2.13259e-05	1.28	4.75791e-06	0.1275	0.627022	FBgn0004889	tws	UTR_5_PRIME	FBgn0037792	CG6241	474 bp DOWNSTREAM
3R_9626907_SNP	A	T	T	0.05114	9	167	1.671	0.0133126	2.325	5.34044e-06	1.997	9.19033e-05	-0.6558	0.158615	> 1 kb from gene
X_14466132_SNP	A	T	T	0.05028	9	170	-1.171	0.032707	1.131	0.0361144	-0.01872	0.979109	-2.3	3.17233e-07	> 1 kb from gene
X_18968775_SNP	T	A	A	0.08427	15	163	-1.381	0.00171775	0.2442	0.565838	-0.5682	0.12475	-1.625	5.51456e-06	> 1 kb from gene
X_18968781_SNP	T	C	C	0.08427	15	163	-1.585	0.000558102	0.01121	0.976692	-0.7865	0.0463184	-1.595	8.30519e-06	> 1 kb from gene
