# Supplementary material for: Quantitative Genetics of Food Intake in Drosophila melanogaster
Source: PLoS One. 2015 Sep 16;10(9):e0138129. doi: 10.1371/journal.pone.0138129 (PMC4574202; doi:10.1371/journal.pone.0138129)
Supplement: S7 Table — Only nominally enriched GO categories were observed. (XLSX) [file pone.0138129.s008.xlsx]

## Sheet: S7 table
Trait	Category	Term	Count	%	P-Value	Benjamini FDR
Mean	GOTERM_BP_FAT	imaginal disc development	6	12.2	0.012	1
	GOTERM_BP_FAT	behavior	6	12.2	0.014	0.97
	GOTERM_BP_FAT	olfactory behavior	3	6.1	0.041	1
	GOTERM_BP_FAT	imaginal disc pattern formation	3	6.1	0.042	1
	GOTERM_MF_FAT	calcium ion binding	5	10.2	0.017	0.87
	GOTERM_MF_FAT	low-density lipoprotein binding	2	4.1	0.029	0.82
	GOTERM_MF_FAT	low-density lipoprotein receptor activity	2	4.1	0.029	0.82
	GOTERM_MF_FAT	lipoprotein binding	2	4.1	0.037	0.77
	GOTERM_MF_FAT	lipoprotein receptor activity	2	4.1	0.037	0.77
	INTERPRO	EGF calcium-binding	3	6.1	0.0027	0.28
	INTERPRO	EGF-like calcium-binding, conserved site	3	6.1	0.005	0.26
	INTERPRO	EGF-type aspartate/asparagine hydroxylation conserved site	3	6.1	0.0053	0.19
	INTERPRO	EGF-like calcium-binding	3	6.1	0.0053	0.19
	INTERPRO	EGF-like, type 3	3	6.1	0.017	0.4
	INTERPRO	EGF-like	3	6.1	0.025	0.46
	INTERPRO	Peptidase S1/S6, chymotrypsin/Hap, active site	4	8.2	0.029	0.45
	INTERPRO	Low-density lipoprotein receptor, YWTD repeat	2	4.1	0.031	0.42
	INTERPRO	EGF-like region, conserved site	3	6.1	0.047	0.52
	SMART	EGF_CA	3	6.1	0.0093	0.28
	SMART	LY	2	4.1	0.042	0.53
	SMART	EGF	3	6.1	0.043	0.4
	SP_PIR_KEYWORDS	egf-like domain	3	6.1	0.014	0.63
	SP_PIR_KEYWORDS	transmembrane protein	3	6.1	0.028	0.62
	UP_SEQ_FEATURE	splice variant	6	12.2	0.021	0.78
CVE	GOTERM_BP_FAT	activation of adenylate cyclase activity by G-protein signaling pathway	2	2.3	0.04	0.93
	GOTERM_BP_FAT	behavior	8	9.1	0.025	0.95
	GOTERM_BP_FAT	cell surface receptor linked signal transduction	11	12.5	0.0089	1
	GOTERM_BP_FAT	epithelium development	6	6.8	0.021	0.98
	GOTERM_BP_FAT	gland development	5	5.7	0.024	0.97
	GOTERM_BP_FAT	gland morphogenesis	4	4.5	0.042	0.92
	GOTERM_BP_FAT	heart development	4	4.5	0.011	0.98
	GOTERM_BP_FAT	immune response	5	5.7	0.027	0.89
	GOTERM_BP_FAT	locomotory behavior	5	5.7	0.034	0.91
	GOTERM_BP_FAT	morphogenesis of an epithelium	6	6.8	0.018	0.99
	GOTERM_BP_FAT	positive regulation of adenylate cyclase activity by G-protein signaling pathway	2	2.3	0.04	0.93
	GOTERM_BP_FAT	regulation of adenylate cyclase activity involved in G-protein signaling	2	2.3	0.04	0.93
	GOTERM_BP_FAT	salivary gland morphogenesis	4	4.5	0.042	0.92
	GOTERM_BP_FAT	secondary branching, open tracheal system	2	2.3	0.027	0.91
	GOTERM_BP_FAT	tissue morphogenesis	6	6.8	0.026	0.93
	GOTERM_CC_FAT	internal side of plasma membrane	3	3.4	0.045	0.99
	GOTERM_MF_FAT	amine receptor activity	3	3.4	0.012	0.52
	GOTERM_MF_FAT	aminoacylase activity	2	2.3	0.049	0.69
	GOTERM_MF_FAT	ligand-dependent nuclear receptor activity	4	4.5	0.00057	0.099
	GOTERM_MF_FAT	metallopeptidase activity	5	5.7	0.032	0.64
	GOTERM_MF_FAT	sequence-specific DNA binding	6	6.8	0.024	0.68
	GOTERM_MF_FAT	steroid hormone receptor activity	3	3.4	0.008	0.53
	GOTERM_MF_FAT	water channel activity	2	2.3	0.035	0.62
	GOTERM_MF_FAT	water transporter activity	2	2.3	0.049	0.69
	GOTERM_MF_FAT	zinc ion binding	14	15.9	0.028	0.65
	INTERPRO	Calponin-like actin-binding	3	3.4	0.021	0.35
	INTERPRO	EF-Hand type	4	4.5	0.033	0.46
	INTERPRO	Immunoglobulin	4	4.5	0.019	0.37
	INTERPRO	Immunoglobulin-like fold	5	5.7	0.0089	0.39
	INTERPRO	N-acyl-L-amino-acid amidohydrolase	2	2.3	0.041	0.5
	INTERPRO	Nuclear hormone receptor, ligand-binding	3	3.4	0.0061	0.4
	INTERPRO	Nuclear hormone receptor, ligand-binding, core	3	3.4	0.0061	0.4
	INTERPRO	Peptidase M1, membrane alanine aminopeptidase, N-terminal	3	3.4	0.012	0.33
	INTERPRO	Peptidase M20	2	2.3	0.048	0.52
	INTERPRO	Peptidase M20, dimerisation	2	2.3	0.048	0.52
	INTERPRO	Steroid hormone receptor	3	3.4	0.0054	0.59
	INTERPRO	Zinc finger, NHR/GATA-type	3	3.4	0.014	0.32
	INTERPRO	Zinc finger, nuclear hormone receptor-type	3	3.4	0.01	0.34
	PIR_SUPERFAMILY	PIRSF036696:ACY-1	2	2.3	0.043	0.37
	PIR_SUPERFAMILY	PIRSF036696:acyl-amino-acid amidohydrolase 1	2	2.3	0.036	0.54
	SMART	CH	3	3.4	0.023	0.29
	SMART	HOLI	3	3.4	0.0069	0.26
	SMART	ZnF_C4	3	3.4	0.011	0.22
	SP_PIR_KEYWORDS	alternative splicing	14	15.9	0.00017	0.016
	SP_PIR_KEYWORDS	disulfide bond	6	6.8	0.03	0.38
	SP_PIR_KEYWORDS	dna-binding	10	11.4	0.0016	0.072
	SP_PIR_KEYWORDS	membrane	14	15.9	0.033	0.37
	SP_PIR_KEYWORDS	phosphoprotein	12	13.6	0.017	0.28
	SP_PIR_KEYWORDS	receptor	8	9.1	0.0076	0.16
	SP_PIR_KEYWORDS	steroid hormone receptor	2	2.3	0.039	0.34
	SP_PIR_KEYWORDS	Transcription	7	8	0.044	0.32
	SP_PIR_KEYWORDS	transcription regulation	7	8	0.041	0.33
	SP_PIR_KEYWORDS	transmembrane	13	14.8	0.038	0.36
	SP_PIR_KEYWORDS	zinc finger	3	3.4	0.044	0.3
	SP_PIR_KEYWORDS	zinc-finger	8	9.1	0.0045	0.13
	UP_SEQ_FEATURE	compositionally biased region:Gln-rich	6	6.8	0.019	0.53
	UP_SEQ_FEATURE	compositionally biased region:Pro-rich	4	4.5	0.045	0.76
	UP_SEQ_FEATURE	DNA-binding region:Nuclear receptor	3	3.4	0.014	0.51
	UP_SEQ_FEATURE	splice variant	14	15.9	0.0034	0.41
	UP_SEQ_FEATURE	zinc finger region:NR C4-type	3	3.4	0.012	0.61
